# Supplementary material for: A synthesis of ocean total alkalinity and dissolved inorganic carbon measurements from 1993 to 2022: the SNAPO-CO2-v1 dataset
Source: Copernicus journal article supplement (doi:10.5194/essd-16-89-2024), 2024-01-09
Supplement: Supplementary file 1 [file essd-16-89-2024-supplement.pdf]

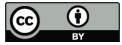

*Supplement of*

**A synthesis of ocean total alkalinity and dissolved inorganic carbon measurements from 1993 to 2022: the SNAPO-CO2-v1 dataset**

**Nicolas Metzl et al.**

*Correspondence to:* Nicolas Metzl ([nicolas.metzl@locean.ipsl.fr](mailto:nicolas.metzl@locean.ipsl.fr))

The copyright of individual parts of the supplement might differ from the article licence.

This document includes Figures S1-S7 and Table S1-S4 providing the supplementary information that supports description of data presented in the main article.

Figure S1: Maps of the dataset with color code for year. Localization of water column sampling

Figure S2: Results of 1156 CRM measurements in 2005-2023

Figure S3: Example of quality control (flags for cruises MOOSE-GE)

Figure S4: Comparison of  $f\text{CO}_2$  measured and calculated at site BOUSSOLE/DYFAMED in the Ligurian Sea

Figure S5: Comparison of  $f\text{CO}_2$  measured and calculated along SURATLANT tracks in the North Atlantic

Figure S6: Comparison of pH measured and calculated at the site ECOSCOPA in the Bay of Brest

Figure S7:  $A_T$ /SSS relationships observed in the Tropical Atlantic near the Congo and Amazon Rivers regions based on different cruises.

Table S1: List of cruises in the SNAPO-CO2-V1 dataset

Table S2: List of cruises with CRM Batch numbers

Table S3: List of cruises with references

Table S4: List of cruises with DOI

**Figure S1:** Top: Same as Figure 1 with Color code for Year. Locations of  $A_T-C_T$  data (1993-2022) in the Global Ocean and the Western Mediterranean Sea (insert). Color code is for Year. Bottom: Locations of data with water column samples. Figures produced with ODV (Schlitzer, 2018).

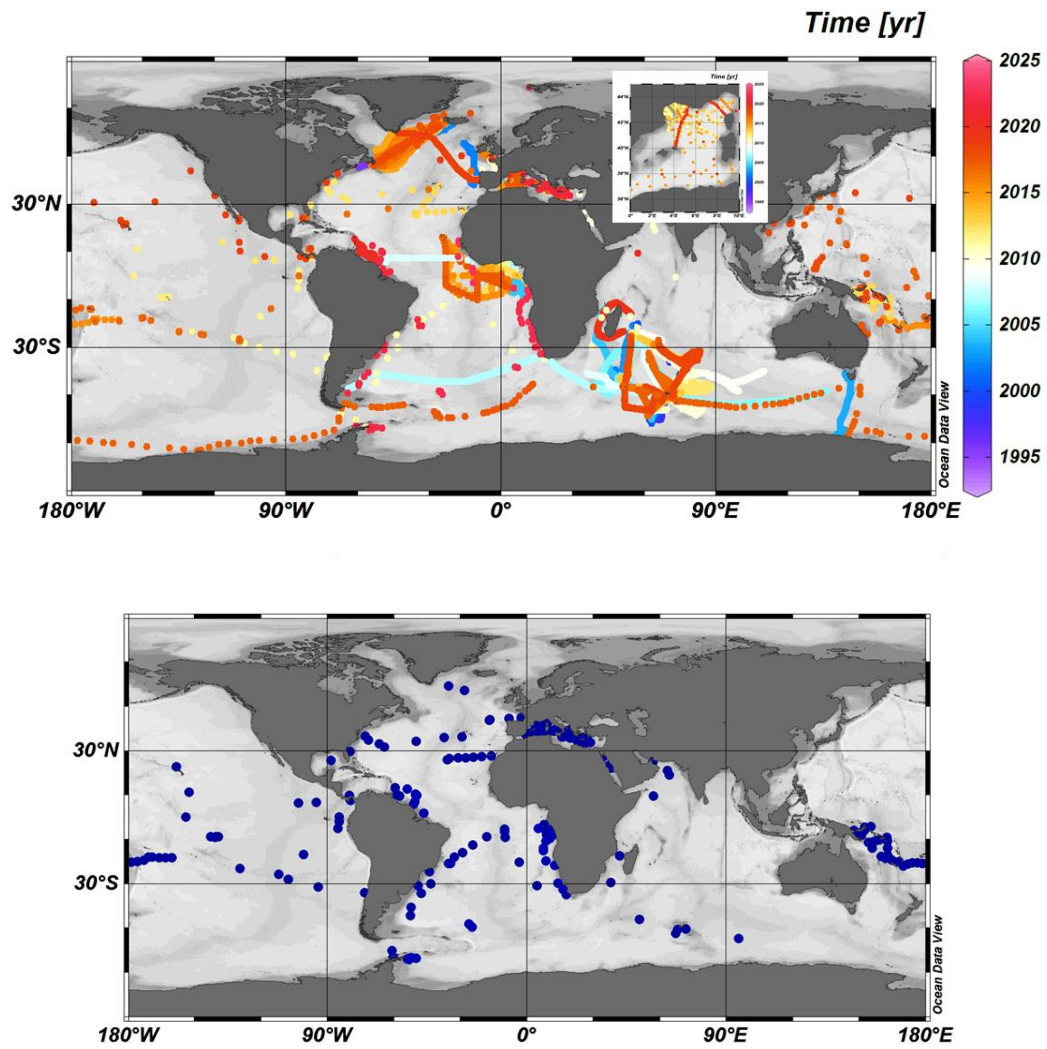

**Figure S2:** Results of CRM measurements in 2005-2023. The plot shows the differences of  $A_T$  versus  $C_T$  (Measured minus CRM reference) for 1156 CRM bottles and different CRM Batches analyzed in 2005-2023. For all 1156 analysis standard-deviations of the differences were  $\pm 3.21 \mu\text{mol.kg}^{-1}$  for  $A_T$  and  $\pm 3.48 \mu\text{mol.kg}^{-1}$  for  $C_T$  (or  $\pm 2.71 \mu\text{mol.kg}^{-1}$  and  $\pm 2.86 \mu\text{mol.kg}^{-1}$  for 1090 analysis when excluding few outliers). Differences higher than  $\pm 5 \mu\text{mol.kg}^{-1}$  were excluded for processing sample analyses but kept in this plot.

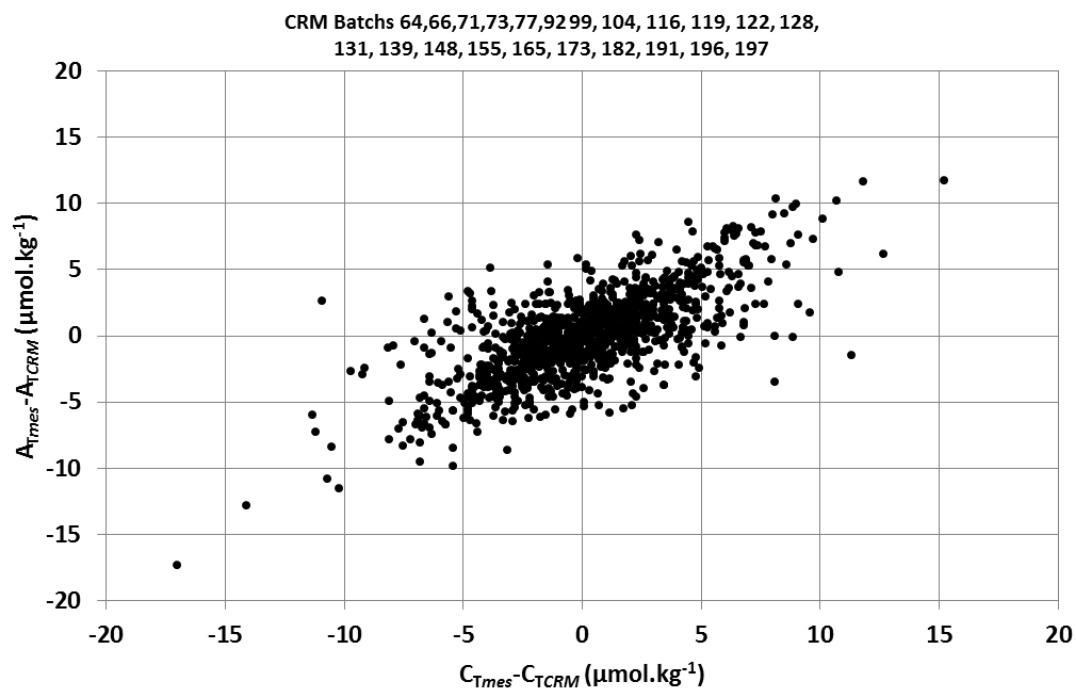

**Figure S3:** Example of Quality control (to assign secondary flags). Left: Depth profiles of  $C_T$ . Right:  $A_T$  versus salinity from the MOOSE-GE cruises in the Mediterranean Sea (2010-2019). All data are shown including Flag 2 (Good, blue), Flag 3 (Questionable, orange) and Flag 4 (Bad, red). Figures produced with ODV (Schlitzer, 2018).

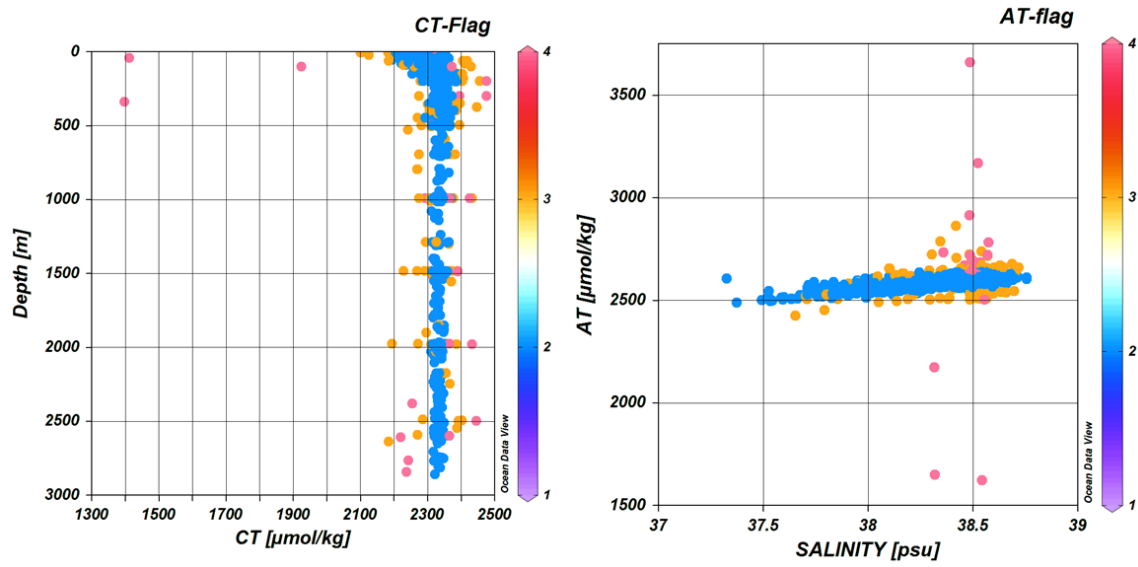

**Figure S4:** Top: Time-series for the period 2013-2018 of  $A_T$  (brown triangles, right Y-axis),  $C_T$  (blue triangles, right Y-axis),  $f\text{CO}_2$  calculated (open triangles, left Y-axis) and high-frequency  $f\text{CO}_2$  measured from CARIOCA (back dotted at 3 and 10m) at the station BOUSSOLE near DYFAMED in the Ligurian Sea (Merlivat et al, 2018; Golbol et al, 2020). For  $A_T$  and  $C_T$  data are selected in the top layer (0-20m) from BOUSSOLE, DYFAMED and MOOSE-GE samples at the same location. Here  $f\text{CO}_2$  is normalized at a temperature 13°C for which the seasonality is mainly driven by  $C_T$  (Merlivat et al., 2018; Coppola et al., 2020). Bottom: Measured  $f\text{CO}_2$  versus calculated  $f\text{CO}_2$  for co-located samples (Dashed line:  $f\text{CO}_2\text{-Carioca} = 1.0341 * f\text{CO}_2\text{-Cal} - 9.321$ ,  $R^2 = 0.8976$ ). The mean difference ( $f\text{CO}_{2\text{cal}} - f\text{CO}_{2\text{mes}}$ ) for 67 co-located samples is  $-3.7 \mu\text{atm} (\pm 10.8) \mu\text{atm}$ . Localization of the samples is shown in the inserted map (orange circle).

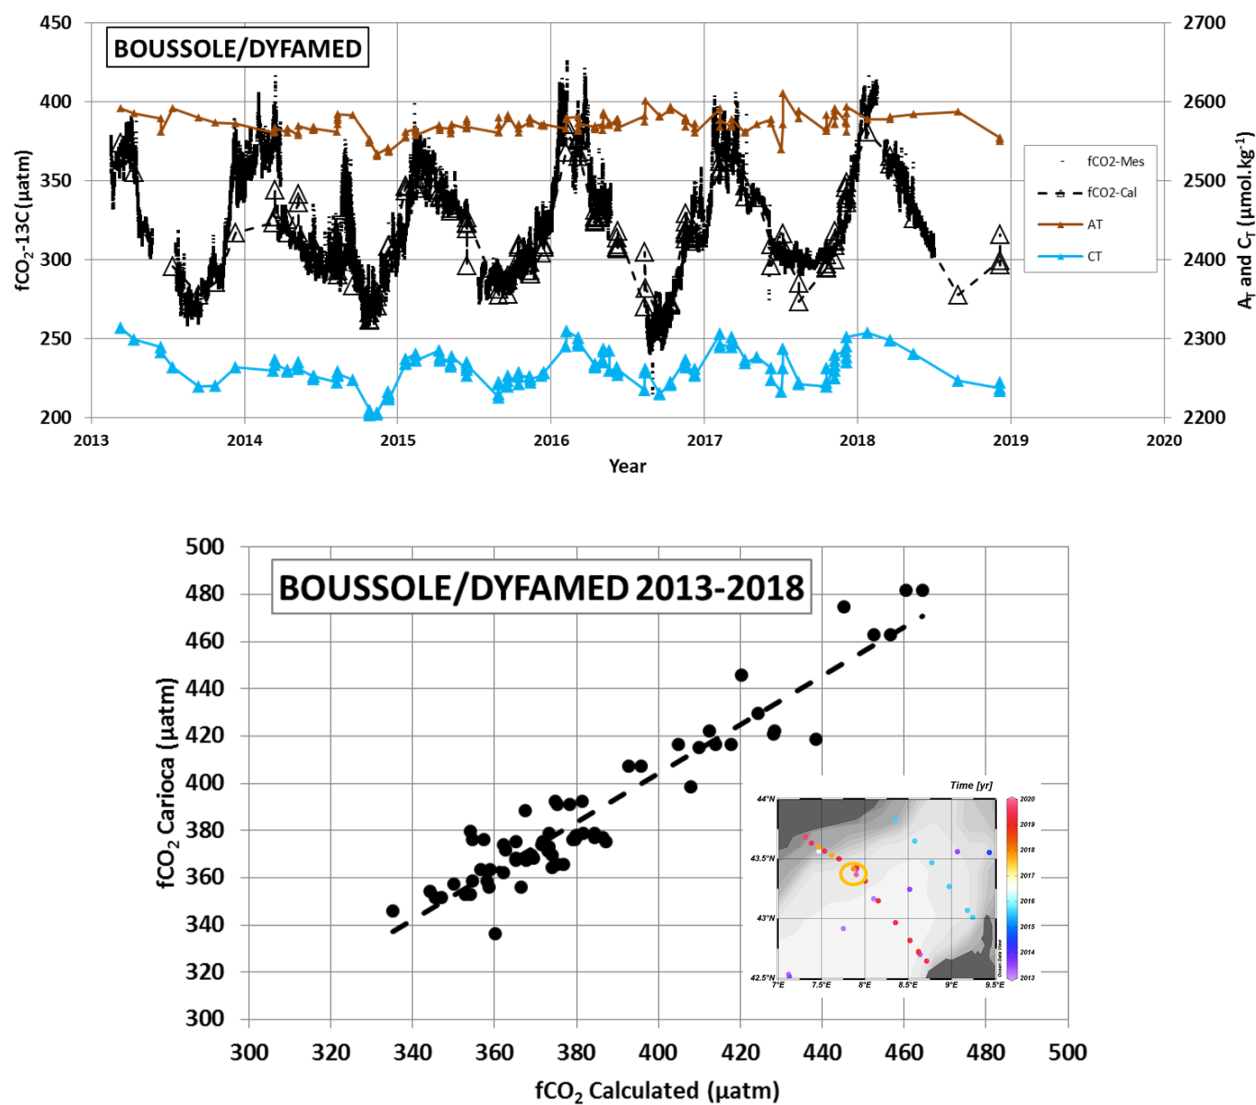

**Figure S5:** Measured  $f\text{CO}_2$  versus calculated  $f\text{CO}_2$  for co-located samples on several SURATLANT transects in the North Atlantic (map inserted). The mean difference ( $f\text{CO}_{2\text{cal}} - f\text{CO}_{2\text{mes}}$ ) for 74 samples in 2004-2007 is  $-4.3 \mu\text{atm}$  ( $\pm 12.9 \mu\text{atm}$ ) (open circles) and for 98 samples in 2014-2015 is  $-3.0$  ( $\pm 12.1$ )  $\mu\text{atm}$  (filled circles). Data from Reverdin et al., (2018).

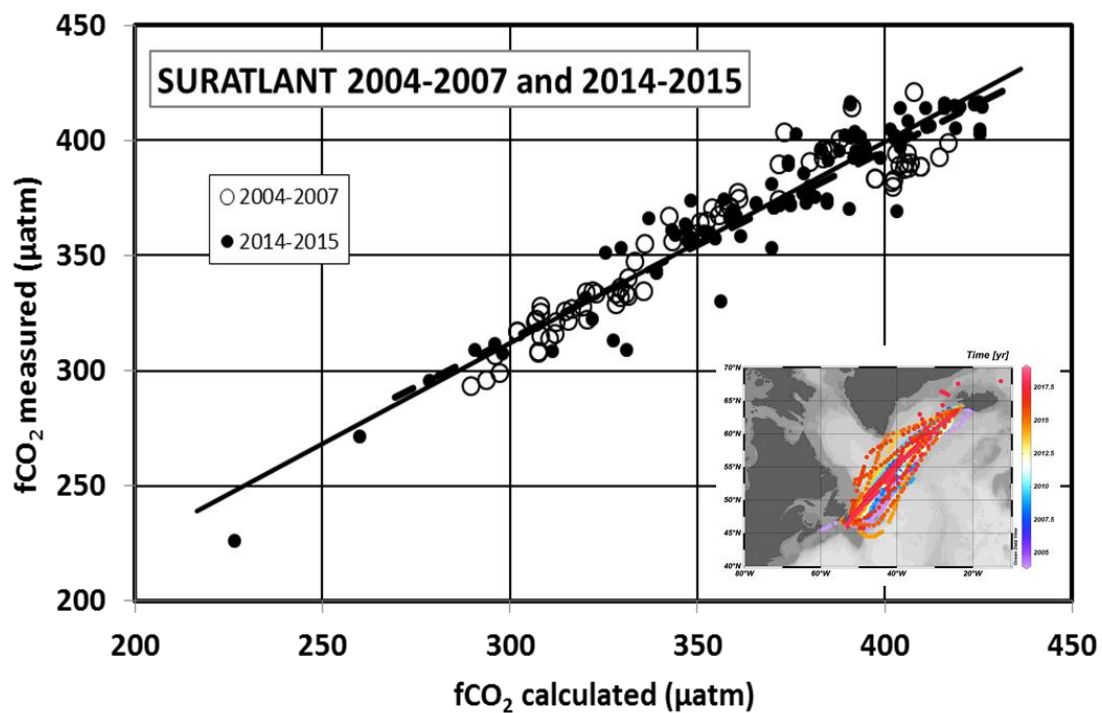

**Figure S6:** Top: Time-series of salinity normalized  $A_T$ ,  $N-A_T$  (brown triangles, right Y-axis), salinity normalized  $C_T$ ,  $N-C_T$  (blue triangles, right Y-axis), pH calculated (open triangles, left Y-axis) and pH measured (filled circles) in the Bay of Brest (Rade de Brest, Brittany) in 2017-2019 (project ECOSCOPA, Petton et al., 2023). pH is here at 25°C (TS Total Scale).  $A_T$  and  $C_T$  are normalized at salinity 35. Bottom: Measured pH versus calculated pH for the same samples. The mean difference ( $pH_{cal}-pH_{mes}$ ) for 46 samples is  $0.013 (\pm 0.010)$ . Localization of the station is shown in the inserted map (red dot).

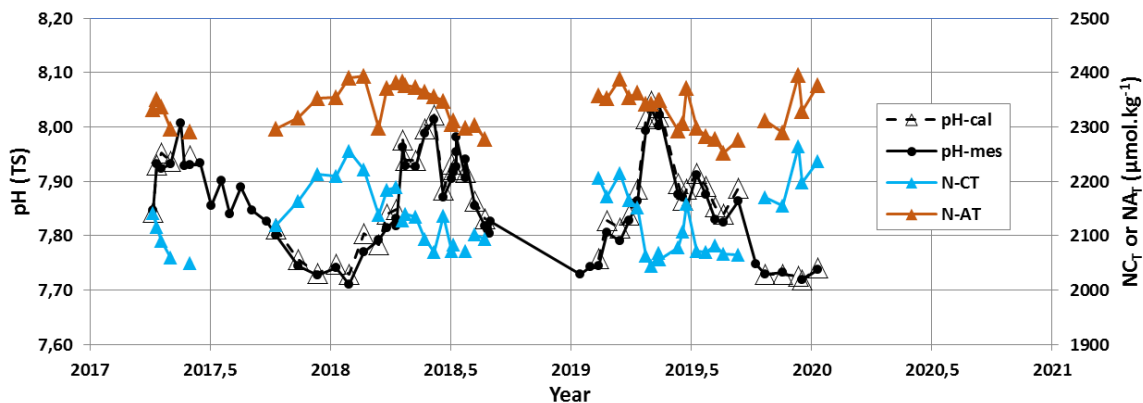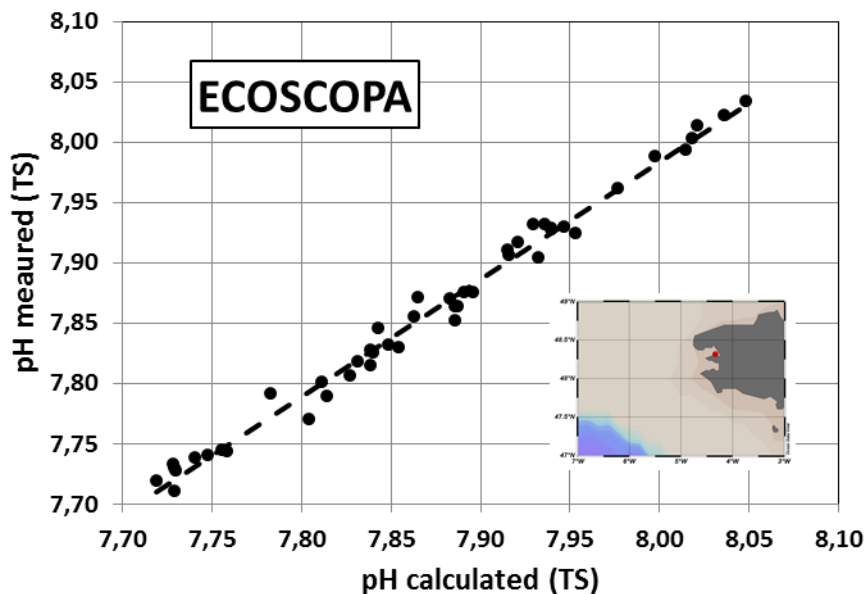



**Figure S7:**  $A_T$ /salinity relationships observed in the western and eastern tropical Atlantic near the Amazon and Congo Rivers regions. Data are from different cruises, season and years. In the Amazon sector data are from PLUMAND, EUREC4-OA and TARA-MICROBIOME cruises (triangles); in the Congo sector data are from EGEE, PIRATA-FR and TARA-MICROBIOME cruises (circles). For the Amazon sector (grey dashed line) the relationship is  $A_T = 60.016 \text{ SSS} + 197.83$  ( $R^2 = 0.9805$ ); for the Congo sector (black dashed line),  $A_T = 65.21 \text{ SSS} + 15.509$  ( $R^2 = 0.9731$ ) very coherent with previous estimates (Koffi et al., 2010; Lefèvre et al., 2010; Lefèvre et al., 2021). Left: all data in both regions. Right: detail for data with Salinity higher than 32. Bottom: map identifying the data selected in the Amazon (triangle) and Congo (circle) regions.

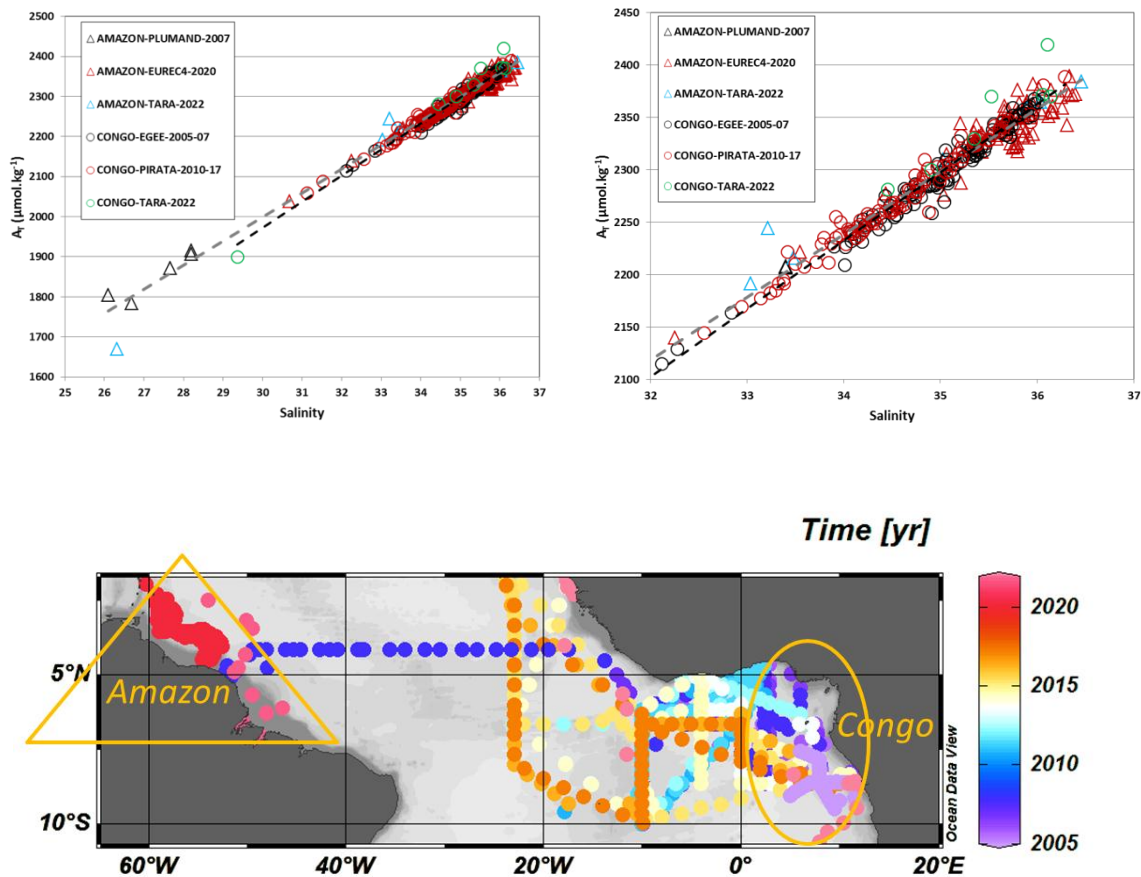

Table S1: List of cruises in the SNAPO-CO2-V1 dataset

| Cruise/Project | Year Start | Year End | Region                       | Sampling                | Nb data | PI (A <sub>T</sub> -C <sub>T</sub> ) | Laboratory             |
|----------------|------------|----------|------------------------------|-------------------------|---------|--------------------------------------|------------------------|
| AWIPEV-CO2     | 2015       | 2021     | Arctic                       | Surface and sub-surface | 195     | Gattuso Jean-Pierre                  | LOV , Villefranche/Mer |
| SURATLANT+RREX | 1993       | 2017     | North Atlantic               | Surface                 | 2832    | Reverdin Gilles                      | LOCEAN, Paris          |
| OVIDE          | 2006       | 2018     | North Atlantic               | Surface, Water Column   | 397     | Metzl Nicolas                        | LOCEAN, Paris          |
| STRASSE        | 2012       | 2012     | North Atlantic               | Water Column            | 205     | Reverdin Gilles                      | LOCEAN, Paris          |
| EUREC4A-OA     | 2020       | 2020     | North Atlantic               | Surface, Water Column   | 135     | Reverdin Gilles                      | LOCEAN, Paris          |
| PROTEUS        | 2010       | 2010     | North Atlantic coastal       | Water Column            | 27      | Le Menn Marc                         | SHOM, Brest            |
| CHANNEL        | 2012       | 2015     | English Channel              | Surface                 | 696     | Bozec Yann                           | SBR, Roscoff           |
| SOMLIT-Brest   | 2008       | 2019     | Coastal North Atlantic       | Surface                 | 1174    | Bozec Yann                           | SBR, Roscoff           |
| SOMLIT-Roscoff | 2009       | 2019     | Coastal North Atlantic       | Surface and 60m         | 801     | Bozec Yann                           | SBR, Roscoff           |
| ECOSCOPA       | 2017       | 2019     | Coastal North Atlantic       | Surface                 | 67      | Petton Sebastien                     | IFREMER, Brest         |
| PENZE          | 2011       | 2020     | River Brittany               | Surface and sub-surface | 148     | Bozec Yann                           | SBR, Roscoff           |
| AULNE          | 2009       | 2010     | River Brittany               | Surface                 | 27      | Bozec Yann                           | SBR, Roscoff           |
| ELORN          | 2009       | 2009     | River Brittany               | Surface                 | 28      | Bozec Yann                           | SBR, Roscoff           |
| BIOZAIRE       | 2003       | 2004     | Trop Atlantic                | Water Column            | 87      | Metzl Nicolas                        | LOCEAN, Paris          |
| EGEE           | 2005       | 2007     | Trop Atlantic                | Surface                 | 199     | Metzl Nicolas                        | LOCEAN, Paris          |
| PIRATA-FR      | 2009       | 2010     | Trop Atlantic                | Surface, Water Column   | 80      | Lefèvre Nathalie                     | LOCEAN, Paris          |
| PIRATA-FR      | 2011       | 2011     | Trop Atlantic                | Surface                 | 62      | Lefèvre Nathalie                     | LOCEAN, Paris          |
| PIRATA-FR      | 2012       | 2012     | Trop Atlantic                | Surface, Water Column   | 68      | Lefèvre Nathalie                     | LOCEAN, Paris          |
| PIRATA-FR      | 2013       | 2013     | Trop Atlantic                | Surface                 | 61      | Lefèvre Nathalie                     | LOCEAN, Paris          |
| PIRATA-FR      | 2014       | 2014     | Trop Atlantic                | Surface, Water Column   | 67      | Lefèvre Nathalie                     | LOCEAN, Paris          |
| PIRATA-FR      | 2015       | 2015     | Trop Atlantic                | Surface                 | 62      | Lefèvre Nathalie                     | LOCEAN, Paris          |
| PIRATA-FR      | 2016       | 2016     | Trop Atlantic                | Surface, Water Column   | 57      | Lefèvre Nathalie                     | LOCEAN, Paris          |
| PIRATA-FR      | 2017       | 2017     | Trop Atlantic                | Surface                 | 58      | Lefèvre Nathalie                     | LOCEAN, Paris          |
| PLUMAND        | 2007       | 2007     | Trop Atlantic                | Surface                 | 38      | Lefevre Nathalie                     | LOCEAN, Paris          |
| OUTPACE        | 2015       | 2015     | Trop Pacific                 | Water Column            | 240     | Wagener Thibaut                      | MIO, Marseille         |
| PANDORA        | 2012       | 2012     | Solomon Sea                  | Water Column            | 178     | Metzl Nicolas                        | LOCEAN, Paris          |
| TARA PACIFIC   | 2016       | 2018     | Tropical Pacific and NATL    | Surface and sub-surface | 325     | Douville Eric                        | LSCE, Gif/Yvette       |
| TARA OCEANS    | 2009       | 2012     | Global Ocean                 | Surface + 400m          | 123     | Gattuso Jean-Pierre                  | LOV , Villefranche/Mer |
| TARA-MICROBIOM | 2021       | 2022     | Atlantic                     | Surface, Water Column   | 216     | Reverdin Gilles                      | LOCEAN, Paris          |
| ACE            | 2016       | 2017     | Southern Ocean               | Surface, Water Column   | 135     | Metzl Nicolas                        | LOCEAN, Paris          |
| MOBYDICK       | 2019       | 2019     | Southern Ocean               | Water Column            | 64      | Lo Monaco Claire                     | LOCEAN, Paris          |
| CLIM-EPARSES   | 2019       | 2019     | Indian                       | Surface                 | 790     | Lo Monaco Claire                     | LOCEAN, Paris          |
| OISO           | 1998       | 2018     | South Indian, Southern Ocean | Surface                 | 24950   | Metzl Nicolas                        | LOCEAN, Paris          |
| DYFAMED        | 1998       | 2017     | MedSea                       | Water Column            | 2118    | Coppola Laurent                      | LOV , Villefranche/Mer |
| BOUSSOLE       | 2014       | 2019     | MedSea                       | Surface + 10m           | 172     | Boutin Jacqueline                    | LOCEAN, Paris          |
| SOMLIT-PointB  | 2007       | 2015     | MedSea Coastal               | Surface + 50m           | 2397    | Gattuso Jean-Pierre                  | LOV , Villefranche/Mer |
| ANTARES        | 2010       | 2016     | MedSea                       | Water Column            | 502     | Lefèvre Dominique                    | MIO, Marseille         |
| MOLA           | 2010       | 2013     | MedSea Coastal               | Water Column            | 66      | Conan Pascal                         | LOM/OOB, Banyuls       |
| SOLEMIO        | 2016       | 2018     | MedSea Coastal               | Water Column            | 212     | Wagener Thibaut                      | MIO, Marseille         |
| MOOSE-GE       | 2010       | 2019     | MedSea                       | Water Column            | 1847    | Coppola Laurent                      | LOV , Villefranche/Mer |
| LATEX          | 2010       | 2010     | MedSea                       | Water Column            | 51      | Anne Petrenko                        | MIO, Marseille         |
| CARBORHONE     | 2011       | 2012     | MedSea                       | Water Column            | 706     | Bozec Yann                           | SBR, Roscoff           |
| CASCADE        | 2011       | 2011     | MedSea                       | Water Column            | 218     | Durrieu de Madron Xavier             | CEFREM, Perpignan      |
| DEWEX          | 2013       | 2013     | MedSea                       | Water Column            | 367     | Conan Pascal                         | LOM/OOB, Banyuls       |
| SOMBA          | 2014       | 2014     | MedSea                       | Water Column            | 203     | Louanchi Ferial                      | ENSSMAL, Alger         |
| AMOR-BFLUX     | 2015       | 2015     | MedSea Coastal               | Water Column            | 6       | Lansard Bruno                        | LSCE, Gif/Yvette       |
| PEACETIME      | 2017       | 2017     | MedSea                       | Water Column            | 233     | Gazeau Frédéric                      | LOV , Villefranche/Mer |
| PERLE          | 2018       | 2021     | MedSea                       | Water Column            | 805     | Wagener Thibaut                      | MIO, Marseille         |

Table S2: List of CRM Batch numbers used for cruises in the SNAPO-CO2-V1 dataset

| Cruise/Project | Year Start | Year End | Region                       | CRM Batch Number                                                         |
|----------------|------------|----------|------------------------------|--------------------------------------------------------------------------|
| AWIPEV-CO2     | 2015       | 2021     | Arctic                       | 148, 155, 165, 173, 182, 196                                             |
| SURATLANT+RREX | 1993       | 2017     | North Atlantic               | 64,66,71,73,77,83,88,95,97,99,104,116,119,128,131,136,139,148,155,165    |
| OVIDE          | 2006       | 2018     | North Atlantic               | 73, 88, 99, 116, 131, 173                                                |
| STRASSE        | 2012       | 2012     | North Atlantic               | 119                                                                      |
| EUREC4A-OA     | 2020       | 2020     | North Atlantic               | 182                                                                      |
| PROTEUS        | 2010       | 2010     | North Atlantic coastal       | 99                                                                       |
| CHANNEL        | 2012       | 2015     | English Channel              | 104, 116, 139                                                            |
| SOMLIT-Brest   | 2008       | 2019     | Coastal North Atlantic       | 83, 88, 92, 95, 97, 99, 104, 111, 116, 139, 155, 173, 182                |
| SOMLIT-Roscoff | 2009       | 2019     | Coastal North Atlantic       | 95,97,99,104,111,116,119,139,155,173,182                                 |
| ECOSCOPA       | 2017       | 2019     | Coastal North Atlantic       | 165,173,182                                                              |
| PENZE          | 2011       | 2020     | River Brittany               | 99, 104, 111                                                             |
| AULNE          | 2009       | 2010     | River Brittany               | 97 or 99                                                                 |
| ELORN          | 2009       | 2009     | River Brittany               | 97 or 99                                                                 |
| BIOZAIRE       | 2003       | 2004     | Trop Atlantic                | 58                                                                       |
| EGEE           | 2005       | 2007     | Trop Atlantic                | 64,71,73,83                                                              |
| PIRATA-FR      | 2009       | 2010     | Trop Atlantic                | 92                                                                       |
| PIRATA-FR      | 2011       | 2011     | Trop Atlantic                | 104                                                                      |
| PIRATA-FR      | 2012       | 2012     | Trop Atlantic                | 111                                                                      |
| PIRATA-FR      | 2013       | 2013     | Trop Atlantic                | 119                                                                      |
| PIRATA-FR      | 2014       | 2014     | Trop Atlantic                | 131                                                                      |
| PIRATA-FR      | 2015       | 2015     | Trop Atlantic                | 139                                                                      |
| PIRATA-FR      | 2016       | 2016     | Trop Atlantic                | 142                                                                      |
| PIRATA-FR      | 2017       | 2017     | Trop Atlantic                | 155                                                                      |
| PLUMAND        | 2007       | 2007     | Trop Atlantic                | 83                                                                       |
| OUTPACE        | 2015       | 2015     | Trop Pacific                 | 139                                                                      |
| PANDORA        | 2012       | 2012     | Solomon Sea                  | 119                                                                      |
| TARA PACIFIC   | 2016       | 2018     | Tropical Pacific and NATL    | 155, 165, 173, 182                                                       |
| TARA OCEANS    | 2009       | 2012     | Global Ocean                 | 97,99,104,111                                                            |
| TARA-MICROBIOM | 2021       | 2022     | Atlantic                     | 197                                                                      |
| ACE            | 2016       | 2017     | Southern Ocean               | 165                                                                      |
| MOBYDICK       | 2019       | 2019     | Southern Ocean               | 173                                                                      |
| CLIM-EPARSES   | 2019       | 2019     | Indian                       | 173                                                                      |
| OISO           | 1998       | 2018     | South Indian, Southern Ocean | 49,52,58,62,64,65,71,76,77,83,91,97, 104,111,119,131,139,148,155,165,173 |
| DYFAMED        | 1998       | 2017     | MedSea                       | 64,66,71,72,73,77,83,88, 92,99, 104,111,131,139,148,155,165,173          |
| BOUSSOLE       | 2014       | 2019     | MedSea                       | 131,139,148,155,165,183,182                                              |
| SOMLIT-PointB  | 2007       | 2015     | MedSea Coastal               | 77,83,88,92,97,99,104,111,116,122,131,139                                |
| ANTARES        | 2010       | 2016     | MedSea                       | 104, 128, 131,139,155,165,182                                            |
| MOLA           | 2010       | 2013     | MedSea Coastal               | 104,116,128                                                              |
| SOLEMIO        | 2016       | 2018     | MedSea Coastal               | 165,173,182                                                              |
| MOOSE-GE       | 2010       | 2019     | MedSea                       | 99,104,116,128, 139,155,165,173,182                                      |
| LATEX          | 2010       | 2010     | MedSea                       | 99                                                                       |
| CARBORHONE     | 2011       | 2012     | MedSea                       | 104, 111, 116                                                            |
| CASCADE        | 2011       | 2011     | MedSea                       | 104                                                                      |
| DEWEX          | 2013       | 2013     | MedSea                       | 122, 128                                                                 |
| SOMBA          | 2014       | 2014     | MedSea                       | 139                                                                      |
| AMOR-BFLUX     | 2015       | 2015     | MedSea Coastal               | 155                                                                      |
| PEACETIME      | 2017       | 2017     | MedSea                       | 165                                                                      |
| PERLE          | 2018       | 2021     | MedSea                       | 173, 182, 191, 196                                                       |

Table S3: List of references for cruises in the SNAPO-CO2-V1 dataset

| Cruise/Project | Year Start | Year End | Region                       | References                                                                                                                           |
|----------------|------------|----------|------------------------------|--------------------------------------------------------------------------------------------------------------------------------------|
| AWIPEV-CO2     | 2015       | 2021     | Arctic                       | Gattuso et al., (2023)                                                                                                               |
| SURATLANT+RREX | 1993       | 2017     | North Atlantic               | Reverdin et al., (2018, 2022)                                                                                                        |
| OVIDE          | 2006       | 2018     | North Atlantic               | Metz et al., (2018)                                                                                                                  |
| STRASSE        | 2012       | 2012     | North Atlantic               | Reverdin (2012)                                                                                                                      |
| EUREC4A-OA     | 2020       | 2020     | North Atlantic               | Speich S. and The Embarked Science Team (2021)                                                                                       |
| PROTEUS        | 2010       | 2010     | North Atlantic coastal       | Division Plans de DMI - SHOM (2010)                                                                                                  |
| CHANNEL        | 2012       | 2015     | English Channel              | Marrec et al., (2014, 2016, 2017)                                                                                                    |
| SOMLIT-Brest   | 2008       | 2019     | Coastal North Atlantic       | Salt et al., (2016)                                                                                                                  |
| SOMLIT-Roscoff | 2009       | 2019     | Coastal North Atlantic       | Gac et al., (2021)                                                                                                                   |
| ECOSCOPA       | 2017       | 2019     | Coastal North Atlantic       | Petton et al., (2023)                                                                                                                |
| PENZE          | 2011       | 2020     | River Brittany               | Gac et al., (2020)                                                                                                                   |
| AULNE          | 2009       | 2010     | River Brittany               | Unpublished                                                                                                                          |
| ELORN          | 2009       | 2009     | River Brittany               | Unpublished                                                                                                                          |
| BIOZAIRE       | 2003       | 2004     | Trop Atlantic                | Vangriesheim et al., (2009), Metz et al., (2016)                                                                                     |
| EGEE           | 2005       | 2007     | Trop Atlantic                | Koffi et al., (2010, 2013)                                                                                                           |
| PIRATA-FR      | 2009       | 2010     | Trop Atlantic                | Lefèvre et al., (2016), Lefèvre (2018a), Lefèvre et al., (2021)                                                                      |
| PIRATA-FR      | 2011       | 2011     | Trop Atlantic                | Lefèvre et al. (2016), Lefèvre (2018b), Lefèvre et al., (2021)                                                                       |
| PIRATA-FR      | 2012       | 2012     | Trop Atlantic                | Lefèvre et al., (2016), Lefèvre (2018c), Lefèvre et al., (2021)                                                                      |
| PIRATA-FR      | 2013       | 2013     | Trop Atlantic                | Lefèvre et al., (2016), Lefèvre (2018d), Lefèvre et al., (2021)                                                                      |
| PIRATA-FR      | 2014       | 2014     | Trop Atlantic                | Lefèvre et al., (2016), Lefèvre (2018e), Lefèvre et al., (2021)                                                                      |
| PIRATA-FR      | 2015       | 2015     | Trop Atlantic                | Lefèvre et al., (2016), Lefèvre (2018f), Lefèvre et al., (2021)                                                                      |
| PIRATA-FR      | 2016       | 2016     | Trop Atlantic                | Lefèvre et al., (2016), Lefèvre (2018g), Lefèvre et al., (2021)                                                                      |
| PIRATA-FR      | 2017       | 2017     | Trop Atlantic                | Lefèvre et al., (2016), Lefèvre (2018h), Lefèvre et al., (2021)                                                                      |
| PLUMAND        | 2007       | 2007     | Trop Atlantic                | Lefèvre et al., (2010)                                                                                                               |
| OUTPACE        | 2015       | 2015     | Trop Pacific                 | Moutin and Bonnet (2015), Wagener et al., (2018a,b)                                                                                  |
| PANDORA        | 2012       | 2012     | Solomon Sea                  | Eldin (2012), Ganachaud et al., (2017)                                                                                               |
| TARA PACIFIC   | 2016       | 2018     | Tropical Pacific and NATL    | Lombard et al., (2022), Douville et al., (2022)                                                                                      |
| TARA OCEANS    | 2009       | 2012     | Global Ocean                 | Pesant et al., (2015), Ficheral et al., (2014)                                                                                       |
| TARA-MICROBIOM | 2021       | 2022     | Atlantic                     | Unpublished                                                                                                                          |
| ACE            | 2016       | 2017     | Southern Ocean               | Walton and Thomas (2018)                                                                                                             |
| MOBYDICK       | 2019       | 2019     | Southern Ocean               | Obemosterer (2018)                                                                                                                   |
| CLIM-EPARSES   | 2019       | 2019     | Indian                       | Lo Monaco et al., (2020)                                                                                                             |
| OISO           | 1998       | 2018     | South Indian, Southern Ocean | Metz et al. (1998), Metz et al., (2006), Leseurre et al., (2022)                                                                     |
| DYFAMED        | 1998       | 2017     | MedSea                       | Coppola et al., (2008, 2020)                                                                                                         |
| BOUSSOLE       | 2014       | 2019     | MedSea                       | Merivat et al., (2018), Golbol et al., (2020)                                                                                        |
| SOMLIT-PointB  | 2007       | 2015     | MedSea Coastal               | Gattuso et al., (2021), Kapsenberg et al., (2017)                                                                                    |
| ANTARES        | 2010       | 2016     | MedSea                       | Lefèvre (2010), Coppola et al., (2020)                                                                                               |
| MOLA           | 2010       | 2013     | MedSea Coastal               | Conan et al., (2010)                                                                                                                 |
| SOLEMIO        | 2016       | 2018     | MedSea Coastal               | Wimart-Rousseau et al., (2020a,b)                                                                                                    |
| MOOSE-GE       | 2010       | 2019     | MedSea                       | Testor et al., (2010), Ulses et al., (2023)                                                                                          |
| LATEX          | 2010       | 2010     | MedSea                       | Patrenko (2010)                                                                                                                      |
| CARBORHONE     | 2011       | 2012     | MedSea                       | Cariou and Bozec (2011a,b, 2012a,b)                                                                                                  |
| CASCADE        | 2011       | 2011     | MedSea                       | Durrieu de Madron (2011), Touratier et al., (2016)                                                                                   |
| DEVEX          | 2013       | 2013     | MedSea                       | Testor (2013), Ulses et al., (2023)                                                                                                  |
| SOMBA          | 2014       | 2014     | MedSea                       | Mortier et al., (2014), Keraghel et al., (2020)                                                                                      |
| AMOR-BFLUX     | 2015       | 2015     | MedSea Coastal               | Rabouille (2015)                                                                                                                     |
| PEACETIME      | 2017       | 2017     | MedSea                       | Guiou et al., (2020)                                                                                                                 |
| PERLE          | 2018       | 2021     | MedSea                       | D'Ortenzio and Taillandier (2018), Durrieu de Madron and Conan (2019), Fujo-Pay et al., (2020, 2021), Wimart-Rousseau et al., (2021) |

Table S4: List of DOI (cruises or data when available) for cruises in the SNAPO-CO2-V1 dataset

| Cruise/Project | Year Start | Year End | Region                       | DOI (Cruise and/or data)                                                                                                                                                                                                                                                                                                                      |
|----------------|------------|----------|------------------------------|-----------------------------------------------------------------------------------------------------------------------------------------------------------------------------------------------------------------------------------------------------------------------------------------------------------------------------------------------|
| AWIPEV-CO2     | 2015       | 2021     | Arctic                       | <a href="https://doi.org/10.1594/PANGAEA.960131">https://doi.org/10.1594/PANGAEA.960131</a>                                                                                                                                                                                                                                                   |
| SURATLANT+RREX | 1993       | 2017     | North Atlantic               | <a href="http://www.sea-noe.org/data/00434/54517">http://www.sea-noe.org/data/00434/54517</a>                                                                                                                                                                                                                                                 |
| OVIDE          | 2006       | 2018     | North Atlantic               | <a href="https://doi.org/10.25921/v0qt-ms48">doi:10.25921/v0qt-ms48</a>                                                                                                                                                                                                                                                                       |
| STRASSE        | 2012       | 2012     | North Atlantic               | <a href="https://doi.org/10.17600/12040060">https://doi.org/10.17600/12040060</a>                                                                                                                                                                                                                                                             |
| EUREC4A-OA     | 2020       | 2020     | North Atlantic               | <a href="https://doi.org/10.13155/80129">https://doi.org/10.13155/80129</a>                                                                                                                                                                                                                                                                   |
| PROTEUS        | 2010       | 2010     | North Atlantic coastal       | <a href="https://doi.org/10.17600/10030040">https://doi.org/10.17600/10030040</a>                                                                                                                                                                                                                                                             |
| CHANNEL        | 2012       | 2015     | English Channel              | <a href="https://doi.org/10.3334/cdiac/ota_coast_ferrybox_rosscoff_plymouth_2012">https://doi.org/10.3334/cdiac/ota_coast_ferrybox_rosscoff_plymouth_2012</a>                                                                                                                                                                                 |
| SOMLUT-Brest   | 2008       | 2019     | Coastal North Atlantic       |                                                                                                                                                                                                                                                                                                                                               |
| SOMLUT-Roscoff | 2009       | 2019     | Coastal North Atlantic       |                                                                                                                                                                                                                                                                                                                                               |
| ECOSCOPA       | 2017       | 2019     | Coastal North Atlantic       | <a href="https://doi.org/10.17882/86131">https://doi.org/10.17882/86131</a>                                                                                                                                                                                                                                                                   |
| PENZE          | 2011       | 2020     | River Brittany               |                                                                                                                                                                                                                                                                                                                                               |
| AULNE          | 2009       | 2010     | River Brittany               |                                                                                                                                                                                                                                                                                                                                               |
| ELORN          | 2009       | 2009     | River Brittany               |                                                                                                                                                                                                                                                                                                                                               |
| BIOZAIRE       | 2003       | 2004     | Trop Atlantic                | <a href="https://doi.org/10.3334/CDIAC/OTG_BIOZAIRE3">doi: 10.3334/CDIAC/OTG_BIOZAIRE3</a>                                                                                                                                                                                                                                                    |
| EGEE           | 2005       | 2007     | Trop Atlantic                | <a href="https://doi.org/10.3334/cdiac/otg_egEE_5">https://doi.org/10.3334/cdiac/otg_egEE_5</a>                                                                                                                                                                                                                                               |
| PIRATA-FR      | 2009       | 2010     | Trop Atlantic                | <a href="https://doi.org/10.7288/v5ww7fzq">https://doi.org/10.7288/v5ww7fzq</a>                                                                                                                                                                                                                                                               |
| PIRATA-FR      | 2011       | 2011     | Trop Atlantic                | <a href="https://doi.org/10.7288/v5In7f1">https://doi.org/10.7288/v5In7f1</a>                                                                                                                                                                                                                                                                 |
| PIRATA-FR      | 2012       | 2012     | Trop Atlantic                | <a href="https://doi.org/10.7288/v55d8q49">https://doi.org/10.7288/v55d8q49</a>                                                                                                                                                                                                                                                               |
| PIRATA-FR      | 2013       | 2013     | Trop Atlantic                | <a href="https://doi.org/10.7288/v5pc30p6">https://doi.org/10.7288/v5pc30p6</a>                                                                                                                                                                                                                                                               |
| PIRATA-FR      | 2014       | 2014     | Trop Atlantic                | <a href="https://doi.org/10.7288/v590rg9">https://doi.org/10.7288/v590rg9</a>                                                                                                                                                                                                                                                                 |
| PIRATA-FR      | 2015       | 2015     | Trop Atlantic                | <a href="https://doi.org/10.7288/v5dv1h58">https://doi.org/10.7288/v5dv1h58</a>                                                                                                                                                                                                                                                               |
| PIRATA-FR      | 2016       | 2016     | Trop Atlantic                | <a href="https://doi.org/10.7288/v5Im27x1">https://doi.org/10.7288/v5Im27x1</a>                                                                                                                                                                                                                                                               |
| PIRATA-FR      | 2017       | 2017     | Trop Atlantic                | <a href="https://doi.org/10.7288/v5ft6lpj">https://doi.org/10.7288/v5ft6lpj</a>                                                                                                                                                                                                                                                               |
| PLUMAND        | 2007       | 2007     | Trop Atlantic                | <a href="https://doi.org/10.17882/53575">https://doi.org/10.17882/53575</a>                                                                                                                                                                                                                                                                   |
| OUTPACE        | 2015       | 2015     | Trop Pacific                 | <a href="https://doi.org/10.25921/wbkb-0q19">doi:10.25921/wbkb-0q19</a> , <a href="https://doi.org/10.17600/15000900">https://doi.org/10.17600/15000900</a>                                                                                                                                                                                   |
| PANDORA        | 2012       | 2012     | Solomon Sea                  | <a href="https://doi.org/10.17600/12010050">https://doi.org/10.17600/12010050</a>                                                                                                                                                                                                                                                             |
| TARA PACIFIC   | 2016       | 2018     | Tropical Pacific and NATL    | <a href="https://doi.org/10.1594/PANGAEA.944420">https://doi.org/10.1594/PANGAEA.944420</a>                                                                                                                                                                                                                                                   |
| TARA OCEANS    | 2009       | 2012     | Global Ocean                 | <a href="https://doi.org/10.1594/PANGAEA.836319">doi:10.1594/PANGAEA.836319</a>                                                                                                                                                                                                                                                               |
| TARA-MICROBIOM | 2021       | 2022     | Atlantic                     |                                                                                                                                                                                                                                                                                                                                               |
| ACE            | 2016       | 2017     | Southern Ocean               | <a href="https://doi.org/10.5281/zenodo.1443511">https://doi.org/10.5281/zenodo.1443511</a>                                                                                                                                                                                                                                                   |
| MOBYDICK       | 2019       | 2019     | Southern Ocean               | <a href="https://doi.org/10.17600/18000403">https://doi.org/10.17600/18000403</a>                                                                                                                                                                                                                                                             |
| CLIM-EPARSES   | 2019       | 2019     | Indian                       | <a href="https://doi.org/10.25921/26rw-w185">https://doi.org/10.25921/26rw-w185</a>                                                                                                                                                                                                                                                           |
| OISO           | 1998       | 2018     | South Indian, Southern Ocean | <a href="https://doi.org/10.18142/238">https://doi.org/10.18142/238</a> , <a href="http://www.nodc.noaa.gov/oceans/VOS_Program/OISO.html">www.nodc.noaa.gov/oceans/VOS_Program/OISO.html</a>                                                                                                                                                  |
| DYFAMED        | 1998       | 2017     | MedSea                       | <a href="https://doi.org/10.18142/131">https://doi.org/10.18142/131</a>                                                                                                                                                                                                                                                                       |
| BOUSSOLE       | 2014       | 2019     | MedSea                       | <a href="https://doi.org/10.17882/71911">https://doi.org/10.17882/71911</a>                                                                                                                                                                                                                                                                   |
| SOMLUT-PointB  | 2007       | 2015     | MedSea Coastal               | <a href="https://doi.org/10.1594/PANGAEA.727120">https://doi.org/10.1594/PANGAEA.727120</a>                                                                                                                                                                                                                                                   |
| ANTARES        | 2010       | 2016     | MedSea                       | <a href="https://doi.org/10.18142/239">https://doi.org/10.18142/239</a>                                                                                                                                                                                                                                                                       |
| MOLA           | 2010       | 2013     | MedSea Coastal               | <a href="https://doi.org/10.18142/234">https://doi.org/10.18142/234</a>                                                                                                                                                                                                                                                                       |
| SOLEMIO        | 2016       | 2018     | MedSea Coastal               | <a href="https://doi.org/10.17882/72356">https://doi.org/10.17882/72356</a>                                                                                                                                                                                                                                                                   |
| MOOSE-GE       | 2010       | 2019     | MedSea                       | <a href="https://doi.org/10.18142/235">https://doi.org/10.18142/235</a>                                                                                                                                                                                                                                                                       |
| LATEX          | 2010       | 2010     | MedSea                       | <a href="https://doi.org/10.17600/10450150">https://doi.org/10.17600/10450150</a>                                                                                                                                                                                                                                                             |
| CARBO RHONE    | 2011       | 2012     | MedSea                       | <a href="https://doi.org/10.17600/12450140">https://doi.org/10.17600/12450140</a>                                                                                                                                                                                                                                                             |
| CASCADE        | 2011       | 2011     | MedSea                       | <a href="https://doi.org/10.17600/11010020">https://doi.org/10.17600/11010020</a>                                                                                                                                                                                                                                                             |
| DBVEX          | 2013       | 2013     | MedSea                       | <a href="https://doi.org/10.17600/13020010">https://doi.org/10.17600/13020010</a>                                                                                                                                                                                                                                                             |
| SOIMBA         | 2014       | 2014     | MedSea                       | <a href="https://doi.org/10.17600/14007500">https://doi.org/10.17600/14007500</a>                                                                                                                                                                                                                                                             |
| AMOR-BFLUX     | 2015       | 2015     | MedSea Coastal               | <a href="https://doi.org/10.17600/15008700">https://doi.org/10.17600/15008700</a>                                                                                                                                                                                                                                                             |
| PEACETIME      | 2017       | 2017     | MedSea                       | <a href="https://doi.org/10.17882/75747">https://doi.org/10.17882/75747</a>                                                                                                                                                                                                                                                                   |
| PERLE          | 2018       | 2021     | MedSea                       | <a href="https://doi.org/10.17600/18000550">https://doi.org/10.17600/18000550</a> , <a href="https://doi.org/10.17600/18000865">https://doi.org/10.17600/18000865</a> , <a href="https://doi.org/10.17600/18001342">https://doi.org/10.17600/18001342</a> , <a href="https://doi.org/10.17600/18001980">https://doi.org/10.17600/18001980</a> |

## **References in the Supplementary Material:**

- Cariou, T., and Bozec, Y.: COMOR-CARBORHONE 1 cruise, RV L'Europe, <https://doi.org/10.17600/11060060>, 2011a.
- Cariou, T., and Bozec, Y.: COMOR-CARBORHONE 2 cruise, RV Téthys II, <https://doi.org/10.17600/11450150>, 2011b.
- Cariou, T., and Bozec, Y.: CARBORHONE 3 cruise, RV Téthys II, <https://doi.org/10.17600/12450020>, 2012a.
- Cariou, T., and Bozec Y.: CARBORHONE 4 cruise, RV Téthys II, <https://doi.org/10.17600/12450140>, 2012b.
- Conan, P., Guieux, A., and Vuillemin, R.: MOOSE (MOLA), <https://doi.org/10.18142/234>, 2010.
- Coppola, L., and Diamond-Riquier, E.: MOOSE (DYFAMED), <https://doi.org/10.18142/131>, 2008.
- Coppola, L., Boutin, J., Gattuso, J.-P., Lefèvre, D., and Metzl, N.: The Carbonate System in the Ligurian Sea. In *The Mediterranean Sea in the Era of Global Change: Evidence from 30 years of multidisciplinary study of the Ligurian Sea*, C. Migon, P. Nival, A. Sciandra, Eds. (ISTE Science Publishing LTD, London, UK, 2020), vol. 1, chap. 4, pp. 79-104. ISBN: 9781786304285. <https://doi.org/10.1002/9781119706960.ch4>, 2020.
- D'Ortenzio, F. and Taillandier, V.: BIO-ARGO-MED-2018 cruise, RV Téthys II, <https://doi.org/10.17600/18000550>, 2018.
- Division Plans de DMI – SHOM: PROTEUS2010\_LEG1 cruise, RV Pourquoi pas ?, <https://doi.org/10.17600/10030040>, 2010.
- Division Plans de DMI – SHOM: PROTEVSMED\_PERLE\_2018 cruise, RV L'Atalante, <https://campagnes.flotteoceanographique.fr/campaign>, 2018.
- Douville, E., Bourdin, G., Lombard, F., Gorsky, G., Fin, J., Metzl, N., Pesant, S., and Tara Pacific Consortium: Seawater carbonate chemistry dataset collected during the Tara Pacific Expedition 2016-2018. PANGAEA, <https://doi.org/10.1594/PANGAEA.944420>, 2022.
- Durrieu de Madron, X.: CASCADE cruise, RV L'Atalante, <https://doi.org/10.17600/11010020>, 2011.
- Durrieu de Madron, X., and Conan, P.: PERLE2 cruise, RV Pourquoi pas ?, <https://doi.org/10.17600/18000865>, 2018.
- Eldin, G. : PANDORA cruise, RV L'Atalante, <https://doi.org/10.17600/12010050>, 2012.
- Gac, J.-P., Marrec, P., Cariou, T., Guillerm, C., Macé, E., Vernet, M., and Bozec, Y.: Cardinal buoys: An opportunity for the study of air-sea CO<sub>2</sub> fluxes in coastal ecosystems. *Front. Mar. Sci.* doi: 10.3389/fmars.2020.00712. 2020.
- Gac, J.-P., Marrec, P., Cariou, T., Grosstefan, E., Macé, E., Rimmelin-Maury, P., Vernet, M., and Bozec, Y.: Decadal Dynamics of the CO<sub>2</sub> System and Associated Ocean Acidification in Coastal Ecosystems of the North East Atlantic Ocean. *Front. Mar. Sci.* 8:688008. doi:10.3389/fmars.2021.688008, 2021.
- Ganachaud, A., Cravatte, S., Sprintall, J., Germineaud, C., Albery, M., Jeandel, C., Eldin, G., Metzl, N., Bonnet, S., Benavides, M., Heimburger, L.-E., Lefèvre, J., Michael, S., Resing, J., Quéroüé, F., Sarthou, G., Rodier, M., Berthelot, H., Baurand, F., Grelet, J., Hasegawa, T., Kessler, W., Kilepak, M., Lacan, F., Privat, E., Send, U., Van Beek, P., Souhaut, M. and Sonke, J. E.: The Solomon Sea: its circulation, chemistry, geochemistry and biology explored during two oceanographic cruises. *Elem Sci Anth*, 5: 33, DOI: <https://doi.org/10.1525/elementa.221>, 2017.
- Gattuso, J.-P., Alliouane, S., and Mousseau, L.: Seawater carbonate chemistry in the Bay of Villefranche, Point B (France), January 2007 - September 2020. PANGAEA [data set], <https://doi.org/10.1594/PANGAEA.727120>, 2021.
- Gattuso, J.-P., Alliouane, S., and Fischer, P.: High-frequency, year-round time series of the carbonate chemistry in a high-Arctic fjord (Svalbard), *Earth Syst. Sci. Data*, 15, 2809–2825, <https://doi.org/10.5194/essd-15-2809-2023>, 2023.
- Gattuso, J.-P., Alliouane, S., and Fischer, P.: High-frequency, year-round time series of the carbonate chemistry in a high-Arctic fjord (Svalbard) v2. PANGAEA [data set], <https://doi.org/10.1594/PANGAEA.960131>, 2023.
- Golbol, M., Vellucci, V., and Antoine, D.: BOUSSOLE, <https://doi.org/10.18142/1>, 2000.
- Golbol M., Boutin J., Merlivat L., Vellucci, V., and Antoine, D.: Dissolved Inorganic Carbon and Total Alkalinity sampled at Boussole site in the Medditerranean Sea. SEANOE. <https://doi.org/10.17882/71911>, 2020.
- Guieu, C., Desboeufs, K., Albani, S., Alliouane, S., Aumont, O., Barbieux, M., Barrillon, S., Baudoux, A.-C., Berline, L., Bhairy, N., Bigeard, E., Bloss, M., Bressac, M., Brito, J., Carlotti, F., de Liege, G., Dinasquet, J., Djaoudi, K., Doglioli, A., D'Ortenzio, F., Doussin, J.-F., Duforet, L., Dulac, F., Dutay, J.-C., Engel, A., Feliu-

- Brito, G., Ferre, H., Formenti, ., Fu, F., Garcia, D., Garel, M., Gazeau, F., Giorio, C., Gregori, G., Grisoni, J.-M., Guasco, S., Guittonneau, J., Haëntjens, N., Heimbürger, L.-E., Helias, S., Jacquet, S., Laurent, B., Leblond, N., Lefevre, D., Mallet, M., Marañón, E., Nabat, P., Nicosia, A., Obernosterer, I., Perez Lorenzo, M., Petrenko, A., Pulido-Villena, E., Raimbault, P., Ridame, C., Riffault, V., Rougier, G., Rousselet, L., Roy-Barman, M., Saiz-Lopez, A., Schmechtig, C., Sellegri, K., Siour, G., Taillandier, V., Tamburini, C., Thyssen, M., Tovar-Sanchez, A., Triquet, S., Uitz, J., Van Wambeke, F., Wagener, T., Zaencker, B.: BIOGEOCHEMICAL dataset collected during the PEACETIME cruise. SEANOE [data set]. <https://doi.org/10.17882/75747>, 2020
- Kapsenberg, L., Alliouane, S., Gazeau, F., Mousseau, L., and Gattuso, J.-P.: Coastal ocean acidification and increasing total alkalinity in the northwestern Mediterranean Sea, *Ocean Sci.*, 13, 411-426, doi:10.5194/os-13-411-2017, 2017.
- Keraghel, M. A., Louanchi, F., Zerrouki, M., Kaci, M. A., Aït-Ameur, N., Labaste, M., Legoff, H., Taillandier, V., Harid, R., and Mortier, L.: Carbonate system properties and anthropogenic carbon inventory in the Algerian Basin during SOMBA cruise (2014): Acidification estimate, *Marine Chemistry*, <https://doi.org/10.1016/j.marchem.2020.103783>. 2020.
- Koffi U., Lefevre, N., Kouadio, G., and Boutin, J.: Surface CO<sub>2</sub> parameters and air-sea CO<sub>2</sub> fluxes distribution in the eastern equatorial Atlantic Ocean. *J. Marine Systems*, doi:10.1016/j.jmarsys/2010.04.010. 2010.
- Koffi, U., Georges, K., and Boutin, J.: Partial pressure (or fugacity) of carbon dioxide, dissolved inorganic carbon, alkalinity, temperature, salinity and other variables collected from Surface underway, discrete sample and profile observations using CTD, Carbon dioxide (CO<sub>2</sub>) gas analyzer and other instruments from ANTEA and L'ATALANTE in the Gulf of Guinea, North Atlantic Ocean and South Atlantic Ocean from 2005-06-09 to 2007-09-30 (NCEI Accession 0108086). NOAA National Centers for Environmental Information. Dataset. [https://doi.org/10.3334/cdiac/otg.egee1\\_6](https://doi.org/10.3334/cdiac/otg.egee1_6), 2013
- Lefèvre, D.: MOOSE (ANTARES), <https://doi.org/10.18142/233>, 2010.
- Lefèvre, N., Diverres, D., and Gallois, F.: Origin of CO<sub>2</sub> undersaturation in the western tropical Atlantic: *Tellus Series B Chemical and Physical Meteorology*. Volume: 62 Issue: 5 Special Issue: SI Pages: 595-607 DOI: 10.1111/j.1600-0889.2010.00475.x, 2010.
- Lefèvre N.: Carbon parameters along a zonal transect. SEANOE. <https://doi.org/10.17882/58575>, 2010.
- Lefèvre, N., Veleza, D., Araujo, M., Caniaux, G.: Variability and trends of carbon parameters at a time series in the eastern tropical Atlantic. *Tellus B*, Co-Action Publishing, 68, pp.30305. 10.3402/tellusb.v68.30305. 2016.
- Lefèvre, N., Mejia, C., Khvorostyanov, D., Beaumont, L., and Koffi, U.: Ocean Circulation Drives the Variability of the Carbon System in the Eastern Tropical Atlantic. *Oceans*, 2021, 2, 126–148. <https://doi.org/10.3390/oceans2010008>, 2021.
- Lefèvre, N.: Discrete profile measurements of dissolved inorganic carbon, total alkalinity, temperature and salinity collected from R/V Antea French PIRATA cruise in Eastern Tropical Atlantic Ocean from 2009-07-10 to 2010-10-01 (NCEI Accession 0171193). NOAA National Centers for Environmental Information. Dataset. <https://doi.org/10.7289/v5ww7fzq>. [last access 22 December 2023]. 2018a.
- Lefèvre, N.: Discrete surface measurements of dissolved inorganic carbon, total alkalinity, temperature and salinity collected from R/V Le Suroit French PIRATA cruise in Eastern Tropical Atlantic Ocean from 2011-05-03 to 2011-05-25, (NCEI Accession 0171197), NOAA National Centers for Environmental Information. Dataset. <https://doi.org/10.7289/v51n7zf1>. [last access 22 December 2023]. 2018b.
- Lefèvre, N.: Discrete profile measurements of dissolved inorganic carbon, total alkalinity, temperature and salinity collected from R/V Le Suroit French PIRATA cruise in Eastern Tropical Atlantic Ocean from 2012-03-21 to 2012-04-30 (NCEI Accession 0171195), NOAA National Centers for Environmental Information. Dataset. <https://doi.org/10.7289/v55d8q49>, [last access 22 December 2023], 2018c.
- Lefèvre, N.: Discrete surface measurements of dissolved inorganic carbon, total alkalinity, temperature and salinity collected from R/V Le Suroit French PIRATA cruise in Eastern Tropical Atlantic Ocean from 2013-05-11 to 2013-06-18 (NCEI Accession 0171189), NOAA National Centers for Environmental Information. Dataset. <https://doi.org/10.7289/v5pc30p6>, [last access 22 December 2023], 2018d.
- Lefèvre, N.: Discrete profile measurements of dissolved inorganic carbon, total alkalinity, temperature and salinity collected from R/V Le Suroit French PIRATA cruise in Eastern Tropical Atlantic Ocean from 2014-04-10 to 2014-05-19 (NCEI Accession 0171194), NOAA National Centers for Environmental Information. Dataset. <https://doi.org/10.7289/v5930rg9>, [last access 22 December 2023], 2018e.
- Lefèvre, N.: Discrete surface measurements of dissolved inorganic carbon, total alkalinity, temperature and salinity collected from R/V Thalassa French PIRATA cruise in Eastern Tropical Atlantic Ocean from 2015-03-18 to 2015-04-15 (NCEI Accession 0171196), NOAA National Centers for Environmental Information. Dataset. <https://doi.org/10.7289/v5dv1h58>, [last access 22 December 2023], 2018f.
- Lefèvre, N.: Discrete surface measurements of dissolved inorganic carbon, total alkalinity, temperature and salinity collected from R/V Thalassa French PIRATA cruise in Eastern Tropical Atlantic Ocean from 2016-03-08 to 2016-04-11 (NCEI Accession 0171190), NOAA National Centers for Environmental Information. Dataset. <https://doi.org/10.7289/v5jm27x1>, [last access 22 December 2023], 2018g.

- Lefèvre, N.: Discrete surface measurements of dissolved inorganic carbon, total alkalinity, temperature and salinity collected from R/V Thalassa French PIRATA cruise in Eastern Tropical Atlantic Ocean from 2017-02-26 to 2017-03-30 (NCEI Accession 0171191), NOAA National Centers for Environmental Information. Dataset. <https://doi.org/10.7289/v5ft8bjj>, [last access 22 December 2023], 2018h.
- Leseurre, C., Lo Monaco, C., Reverdin, G., Metzl, N., Fin, J., Mignon, C., and Benito, L.: Summer trends and drivers of sea surface fCO<sub>2</sub> and pH changes observed in the southern Indian Ocean over the last two decades (1998–2019), *Biogeosciences*, 19, 2599–2625, <https://doi.org/10.5194/bg-19-2599-2022>, 2022.
- Lo Monaco, C., Metzl, N., Fin, J., and Tribollet, A.: Sea surface measurements of dissolved inorganic carbon (DIC) and total alkalinity (TALK), temperature and salinity during the R/V Marion-Dufresne cruise CLIM-EPARSES (EXPCODE 35MV20190405) in the Indian Ocean and Mozambique Channel from 2019-04-04 to 2019-04-30. (NCEI Accession 0212218). NOAA National Centers for Environmental Information. Dataset. <https://doi.org/10.25921/26rw-w185>. 2020.
- Lombard, F., Bourdin, G., Pesant, S., Agostini, S., Baudena, A., Boissin, E., Cassar, N., Clampitt, M., Conan, P., Da Silva, O., Dimier, C., Douville, E., Elineau, A., Fin, J., Flores, J.-M., Ghiglione, J.-F., Hume, B. C. C., Jalabert, L., John, S. G., Kelly, R. L., Koren, I., Lin, Y., Marie, D., McMinds, R., Mériquet, Z., Metzl, N., Paz-García, D. A., Luiza Pedrotti, M., Poulain, J., Pujo-Pay, M., Ras, J., Reverdin, G., Romac, S., Röttinger, E., Vardi, A., Voolstra, C. R., Moulin, C., Iwankow, G., Banaigs, B., Bowler, C., de Vargas, C., Forcioli, D., Furla, P., Galand, P. E., Gilson, E., Reynaud, S., Sunagawa, S., Thomas, O., Troublé, R., Vega Thurber, R., Wincker, P., Zoccola, D., Allemand, D., Planes, S., Boss, E., and Gorsky, G.: Open science resources from the Tara Pacific expedition across the surface ocean and coral reef ecosystems. *Sci Data* 10, 324 (2023). <https://doi.org/10.1038/s41597-022-01757-w>, 2022.
- Marrec, P., Cariou, T., Latimier, M., Macé, E., Morin, P., Vernet, M., and Bozec, Y.: Spatio-temporal dynamics of biogeochemical processes and air–sea CO<sub>2</sub> fluxes in the Western English Channel based on two years of FerryBox deployment. *Journal of Marine Systems*, Special Issue: 5<sup>th</sup> FerryBox Workshop. 10.1016/j.jmarsys.2014.05.010. 2014.
- Marrec, P., and Bozec, Y.: Partial pressure (or fugacity) of carbon dioxide, dissolved inorganic carbon, alkalinity and salinity collected from Surface underway observations using Carbon dioxide (CO<sub>2</sub>) gas analyzer and other instruments from ARMORIQUE in the English Channel from 2012-04-25 to 2013-01-03 (NCEI Accession 0157472). Version 1.1. NOAA National Centers for Environmental Information. Dataset. doi:10.3334/CDIAC/OTG.COAST\_FERRYBOX\_ROSCOFF\_PLYMOUTH\_2012. 2016a.
- Marrec, P., and Bozec, Y.: Partial pressure (or fugacity) of carbon dioxide, dissolved inorganic carbon, alkalinity and salinity collected from Surface underway observations using Carbon dioxide (CO<sub>2</sub>) gas analyzer and other instruments from ARMORIQUE in the English Channel from 2013-03-15 to 2013-12-22 (NCEI Accession 0157444). Version 1.1. NOAA National Centers for Environmental Information. Dataset. doi:10.3334/CDIAC/OTG.COAST\_FERRYBOX\_ROSCOFF\_PLYMOUTH\_2013. 2016b.
- Marrec, P., and Bozec, Y.: Partial pressure (or fugacity) of carbon dioxide, dissolved inorganic carbon, alkalinity and salinity collected from surface underway observations using Carbon dioxide (CO<sub>2</sub>) gas analyzer and other instruments from ARMORIQUE in the English Channel from 2014-03-18 to 2014-10-09 (NCEI Accession 0163193). Version 1.1. NOAA National Centers for Environmental Information. Dataset. doi:10.3334/CDIAC/OTG.COAST\_FERRYBOX\_ROSCOFF\_PLYMOUTH\_2014. 2017.
- Merlivat, L., Boutin, J., Antoine, D., Beaumont, L., Golbol, M., and Vellucci, V.: Increase of dissolved inorganic carbon and decrease in pH in near-surface waters in the Mediterranean Sea during the past two decades, *Biogeosciences*, 15, 5653–5662, <https://doi.org/10.5194/bg-15-5653-2018>, 2018.
- Metzl, N., Brunet, C., Jabaud-Jan, A., Poisson, A., and Schauer, B.: Summer and winter air-sea CO<sub>2</sub> fluxes in the Southern Ocean *Deep Sea Res I*, 53, 1548–1563, doi:10.1016/j.dsr.2006.07.006. 2006.
- Metzl, N., and Lo Monaco, C.: OISO - Océan Indien Service d'Observation, <https://doi.org/10.18142/228>, 1998.
- Metzl, N., Pierre, C., and Vangriesheim, A.: Dissolved inorganic carbon, water temperature, salinity and other variables collected from discrete samples and profile observations during the R/V L'Atalante BIOZAIRE III cruise (EXPCODE 35A320031214) in the South Atlantic Ocean from 2003-12-14 to 2004-01-07, NCEI Accession 0157467, NOAA National Centers for Environmental Information [data set], <https://doi.org/10.3334/cdiac/otg.biozaire3>, 2016
- Metzl, N., Ferron, B., Lherminier, P., Sarthou, G., Thierry, V.: Discrete profile measurements of dissolved inorganic carbon (DIC), total alkalinity (TALK), temperature and salinity during the multiple ships Observatoire de la variabilité interannuelle et décennale en Atlantique Nord (OVIDE) project, OVIDE-2006, OVIDE-2008, OVIDE-2010, OVIDE-2012, OVIDE-2014 cruises in the North Atlantic Ocean from 2006-05-23 to 2014-06-30 (NCEI Accession 0177219). Version 1.1. NOAA National Centers for Environmental Information. Dataset. doi:10.25921/v0qt-ms48, 2018.



- Mortier, L., Ait Ameer, N., and Taillandier, V.: SOMBA-GE-2014 cruise, RV Téthys II, <https://doi.org/10.17600/14007500>, 2014.
- Moutin, T., and Bonnet, S.: OUTPACE cruise, RV L'Atalante, <https://doi.org/10.17600/15000900>, 2015.
- Obernosterer, I.: MOBYDICK-THEMISTO cruise, RV Marion-Dufresne, <https://doi.org/10.17600/18000403>, 2018.
- Pesant, S., Not, F., Picheral, M., Kandels-Lewis, S., Le Bescot, N., Gorsky, G., Iudicone, D., Karsenti, E., Speich, S., Troublé, R., Dimier, C., Searson, S., and Tara Oceans Consortium Coordinators: Open science resources for the discovery and analysis of Tara Oceans data. *Scientific Data* 2, 150023. doi: 10.1038/sdata.2015.23, 2015.
- Petrenko, A.: LATEX10 cruise, RV Téthys II, <https://doi.org/10.17600/10450150>, 2010.
- Petton, S., Pouvreau, S., and Fleury, E.: ECOSCOPA network: high frequency environmental database. SEANOE [data set]. <https://doi.org/10.17882/86131>, 2023.
- Picheral, M., Searson, S., Taillandier, V., Bricaud, A., Boss, E., Ras, J., Claustre, H., Ouhssain, M., Morin, P., Coppola, L., Gattuso, J.-P., Metzl, N., Thuillier, D., Gorsky, G., Tara Oceans Consortium, Coordinators; Tara Oceans Expedition, Participants: Vertical profiles of environmental parameters measured on discrete water samples collected with Niskin bottles during the Tara Oceans expedition 2009–2013. PANGAEA [data set], doi:10.1594/PANGAEA.836319, 2014.
- Pujo-Pay, M., Durrieu de Madron, X., and Conan, P.: PERLE3 cruise, RV Pourquoi pas ?, <https://doi.org/10.17600/18001342>, 2020.
- Pujo-Pay, M., Durrieu de Madron, X., and Conan, P.: PERLE4 cruise, RV L'Atalante, <https://doi.org/10.17600/18001980>, 2021.
- Rabouille C.: AMOR-BFLUX cruise, RV Téthys II, <https://doi.org/10.17600/15008700>, 2015.
- Reverdin, G.: STRASSE cruise, RV Thalassa, <https://doi.org/10.17600/12040060>, 2012.
- Reverdin, G., Metzl, N., Olafsdottir, S., Racapé, V., Takahashi, T., Benetti, M., Valdimarsson, H., Benoit-Cattin, A., Danielsen, M., Fin, J., Naamar, A., Pierrot, D., Sullivan, K., Bringas, F., and Goni, G.: SURATLANT: a 1993–2017 surface sampling in the central part of the North Atlantic subpolar gyre, *Earth Syst. Sci. Data*, 10, 1901–1924, <https://doi.org/10.5194/essd-10-1901-2018>, 2018.
- Reverdin, G., Metzl, N., Olafsdottir, S., Racapé, V., Takahashi, T., Benetti, M., Valdimarsson, H., Quay, P. D., Benoit-Cattin, A., Danielsen, M., Fin, J., Naamar, A., Pierrot, D., Sullivan, K., Bringas, F., and Goni, G.: SURATLANT: a surface dataset in the central part of the North Atlantic subpolar gyre. SEANOE [data set]. <https://doi.org/10.17882/54517>, 2022.
- Salt, L. A., Beaumont, L., Blain, S., Bucciarelli, E., Grossteffan, E., Guillot, A., L'Helguen, S., Merlivat, L., Répécaud, M., Quémener, L., Rimmelin-Maury, P., Tréguer, P., and Bozec, Y.: The annual and seasonal variability of the carbonate system in the Bay of Brest (Northwest Atlantic Shelf, 2008–2014). *Marine Chemistry*, doi:10.1016/j.marchem.2016.09.003, 2016.
- Schlitzer, R.: Ocean Data View, Ocean Data View, <http://odv.awi.de> (last access: 13 March 2019), 2018.
- Speich, S., and The Embarked Science Team: EUREC4A-OA. Cruise Report. 19 January – 19 February 2020. Vessel: L'ATALANTE. <https://doi.org/10.13155/80129>, 2021
- Testor, P., Bosse, A., and Coppola, L.: MOOSE-GE, <https://doi.org/10.18142/235>, 2010.
- Testor, P.: DEWEX-MERMEX 2013 LEG1 cruise, RV Le Suroît, <https://doi.org/10.17600/13020010>, 2013.
- Touratier, F., Goyet, C., Houpert, L., Durrieu de Madron, X., Lefèvre, D., Stabholz, M., and Guglielmi, V.: Role of deep convection on anthropogenic CO<sub>2</sub> sequestration in the Gulf of Lions (northwestern Mediterranean Sea). *Deep-Sea Research Part I*. doi:10.1016/j.dsr.2016.04.003, 2016.
- Ulses, C., Estournel, C., Marsaleix, P., Soetaert, K., Fourrier, M., Coppola, L., Lefèvre, D., Touratier, F., Goyet, C., Guglielmi, V., Kessouri, F., Testor, P., and Durrieu de Madron, X.: Seasonal dynamics and annual budget of dissolved inorganic carbon in the northwestern Mediterranean deep-convection region, *Biogeosciences*, 20, 4683–4710, <https://doi.org/10.5194/bg-20-4683-2023>, 2023.
- Vangriesheim A., Pierre, C., Aminot, A., Metzl, N., Baurand, F., and Caprais, J.-C.: The influence of Congo river discharges in the surface and deep layers of the Gulf of Guinea. *Deep-Sea Res. II*, doi: 10.1016/j.dsr2.2009.04.002, 2009.
- Wagener, T., Metzl, N., Caffin, M., Fin, J., Helias Nunige, S., Lefevre, D., Lo Monaco, C., Rougier, G., and Moutin, T.: Carbonate system distribution, anthropogenic carbon and acidification in the western tropical South Pacific (OUTPACE 2015 transect), *Biogeosciences*, 15, 5221–5236, <https://doi.org/10.5194/bg-15-5221-2018>, 2018a.
- Wagener, T., Metzl, N., Caffin, M., Fin, J., Helias Nunige, S., Lefevre, D., Lo Monaco, C., Rougier, G., and Moutin, T.: Discrete profile measurements of dissolved inorganic carbon (DIC), total alkalinity (TALK), temperature, salinity and other parameters during the R/V L'Atalante "Oligotrophy from Ultra-oligoTrophy PACific Experiment" (OUTPACE) cruise (EXPCODE 35A320150218) in the South Pacific Ocean from

- 2015-02-18 to 2015-04-03 (NCEI Accession 0177706). Version 1.1. NOAA National Centers for Environmental Information. Dataset. doi:10.25921/wbkb-0q19 [access date], 2018b.
- Walton, D. W. H., and Thomas, J.: Cruise Report - Antarctic Circumnavigation Expedition (ACE) 20th December 2016 - 19th March 2017 (1.0). Zenodo. <https://doi.org/10.5281/zenodo.1443511>, 2018.
- Wimart-Rousseau, C., Lajaunie-Salla, K., Marrec, P., Wagener, T., Raimbault, P., Lagadec, V., Lafont, M., Garcia, N., Diaz, F., Pinazo, C., Yohia, C., Garcia, F., Xueref-Remy, I., Blanc, P.-E., Armengaud, A., and Lefèvre, D.: Temporal variability of the carbonate system and air-sea CO<sub>2</sub> exchanges in a Mediterranean human-impacted coastal site. *Estuarine, Coastal and Shelf Science*. <https://doi.org/10.1016/j.ecss.2020.106641>, 2020a.
- Wimart-Rousseau, C., Wagener, T., Raimbault, P., Lagadec, V., Lafont, M., Garcia, N., and Lefèvre, D.: Oceanic carbonate chemistry measurements from discrete samples collected at the SOLEMIO station (Bay of Marseille - North western Mediterranean Sea) between 2016 and 2019. SEANOE. <https://doi.org/10.17882/72356>, 2020b.
- Wimart-Rousseau, C., Wagener, T., Álvarez, M., Moutin, T., Fourier, M., Coppola, L., Niclas-Chirurgien, L., Raimbault, P., D'Ortenzio, F., Durrieu de Madron, X., Taillandier, V., Dumas, F., Conan, P., Pujo-Pay, M. and Lefèvre, D.: Seasonal and Interannual Variability of the CO<sub>2</sub> System in the Eastern Mediterranean Sea: A Case Study in the North Western Levantine Basin. *Front. Mar. Sci.* 8:649246. doi: 10.3389/fmars.2021.649246, 2021.
